# Supplementary material for: Identification of miRNomes reveals ssc-miR-30d-R_1 as a potential therapeutic target for PRRS viral infection
Source: PubMed Central journal article supplement (PMC4846818; doi:10.1038/srep24854), 2016-04-27
Supplement: srep24854-s1.pdf [file srep24854-s1.pdf]

**Supplementary Information for “Identification of miRNomes reveals  
ssc-miR-30d-R\_1 as a potential therapeutic target for PRRS viral  
infection”**

Chengmin Wang<sup>1§</sup>, Yanyu Zhang<sup>2§</sup>, Jing Luo<sup>1§</sup>, Hua Ding<sup>3</sup>, Shelan Liu<sup>4</sup>, Said Amer<sup>5</sup>, Li  
xie<sup>3</sup>, Wenting Lyv<sup>1</sup>, Wen Su<sup>1</sup>, Meng Li<sup>1</sup>, Qinmiao Sun<sup>1</sup>, Jiayin Dai<sup>1</sup> and Hongxuan He<sup>1\*</sup>

<sup>1</sup>Key Lab of Animal Ecology and Conservation Biology, Institute of Zoology, Chinese  
Academy of Sciences, Beijing, 100101, P.R China;

<sup>2</sup>Beijing Institute of Transfusion Medicine, Academy of Military Medicine Sciences,  
Beijing, 100850, P.R China;

<sup>3</sup>Department of Infectious Disease, Hangzhou Center for Disease Control and  
Prevention, Hangzhou, Zhejiang Province, 310021, P.R China;

<sup>4</sup>Department of Infectious diseases, Zhejiang Center for Disease Control and  
Prevention, Hangzhou, Zhejiang Province, 310051, P.R China;

<sup>5</sup>Department of Zoology, Faculty of Science, Kafr El sheikh University, Kafr El  
sheikh 33516, Egypt

<sup>§</sup>These authors contributed equally to this paper.

\*Authors for correspondence: [hehx@ioz.ac.cn](mailto:hehx@ioz.ac.cn)

**Fig. S1. ssc-miR-30d\_R-1 does not directly target the PRRSV genome.**

MARC-145 cells transfected with construct encoding wild-type (WT) or mutated (Mut) viral gene 3'-UTR plus mimics. MARC-145 cells were co-transfected with 0.1 mg of indicated constructing luciferase reporter, 0.05 mg of pRL-TK, and 30 nM of ssc-miR-30d\_R-1 mimic or negative control of mimic. At 24 h post-transfection, cells were lysed for dual-luciferase assay. The relative luciferase activities (ssc-miR-30d\_R-1/NC) refer to fold change in luciferase activity in ssc-miR-30d\_R-1 mimic-transfected cells relative to respective NC mimic-transfected controls. \*P < 0.05 and \*\*P < 0.01 (Student's t-test). Data are from three independent experiments (mean±SD).

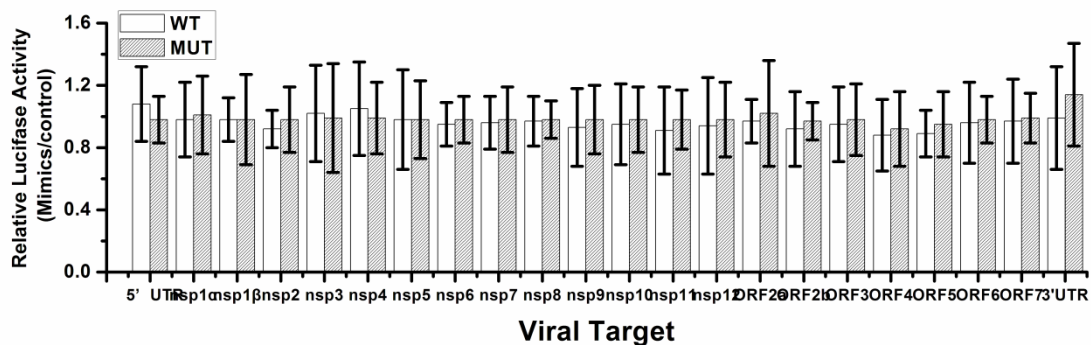

**Fig. S2. The suppressive effect of ssc-miR-30d\_R-1 on pro-inflammatory**

**cytokines.** A-D indicates ssc-miR-30d\_R-1 mimic and control mimic in PAM cells. ssc-miR-30d\_R-1 mimic reduced mRNA expression level of pro-inflammatory (IL-8, IL-6, TNF-α and IL-1β) in a time-dependent manner in MARC-145 cells. E-H indicates ssc-miR-30d\_R-1 inhibitor enhanced mRNA expression level of

pro-inflammatory (IL-8, IL-6, TNF- $\alpha$  and IL-1 $\beta$ ) in a time-dependent manner in MARC-145 cells (F). MARC-145 were transfected with mimic or inhibitor and followed by PRRSV infection (MOI = 0.1). Data are expressed as means standard deviations of three independent experiments. P values were calculated using Student's t test. \*P<0.05; \*\*P<0.01;\*\*\* P<0.001. Similar results in PAM cells were shown in

Fig.3.

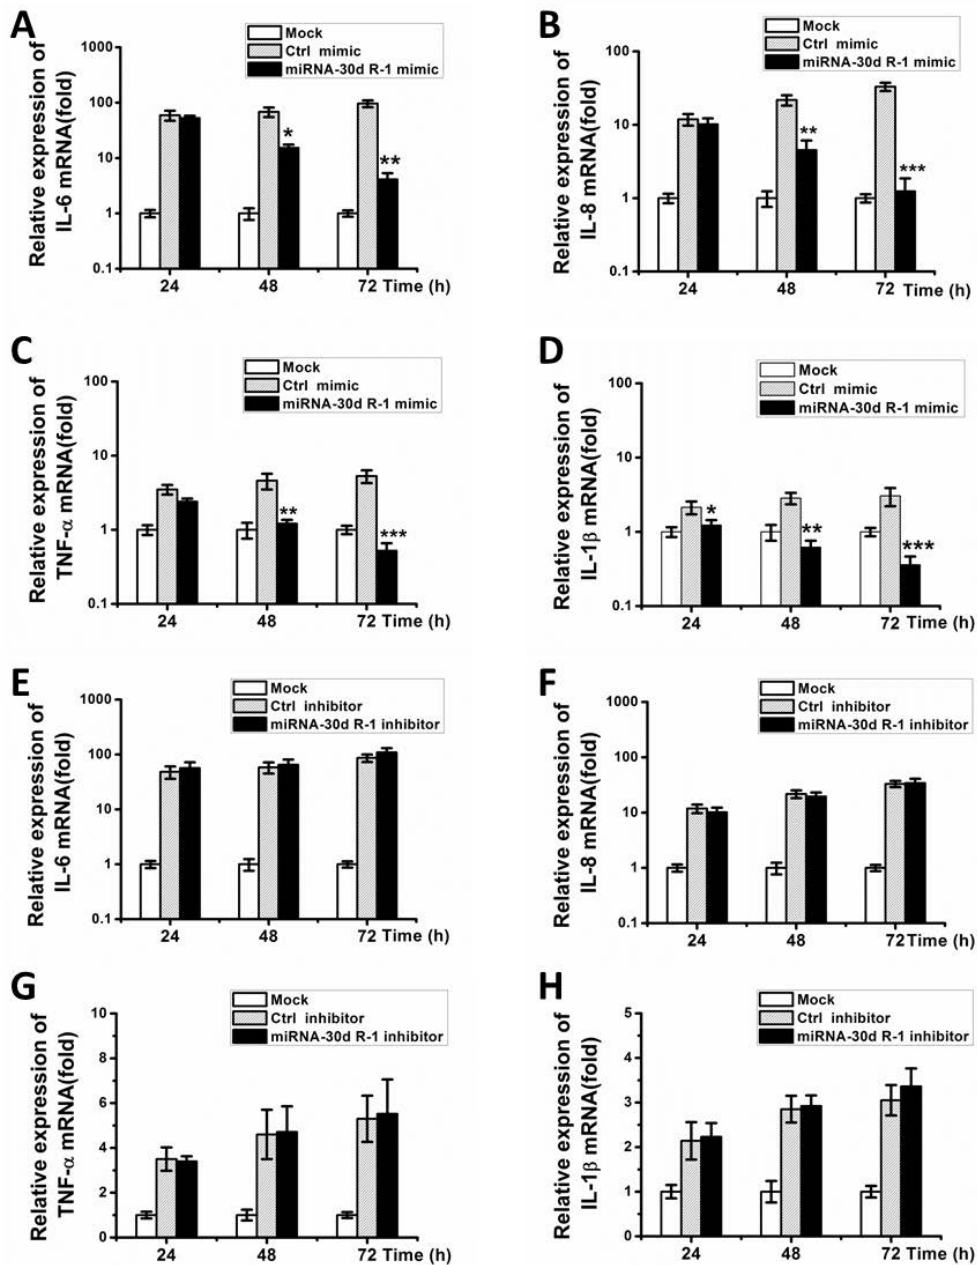

**Table S1. The primers of cytokines mRNA used for Q-PCR.**

|                      | <b>Na<br/>me</b> | <b>Forward Primer</b>            | <b>Reversed Primer</b>        | <b>Probe</b>                 |
|----------------------|------------------|----------------------------------|-------------------------------|------------------------------|
| <b>MAR<br/>C-145</b> | β-act<br>in      | TGACTGACTACCTCATG<br>AAGATCC     | TCTCCTTAATGTCAC<br>GCACGATT   | CGGCTACAGCTTCA<br>CCACCACGGC |
|                      | IL-6             | AGAGGCACTGGCAGAA<br>AAC          | TGCAGGAACTGGATC<br>AGGAC      |                              |
|                      | IL-8             | AGGACAAGAGCCAGGA<br>AGAA         | ACTGCACCTTCACAC<br>AGAGC      |                              |
|                      | IL-1<br>β        | GGAAGACAAATTGCAT<br>GG           | CCCAACTGGTACATC<br>AGCAC      |                              |
|                      | TNF<br>-α        | TCTGTCTGCTGCACTTT<br>GGAGTGA     | TTGAGGGTTTGCTAC<br>AACATGGGC  |                              |
|                      | GA               | CGGAGTCAACGGATTTG                | AGCCTTTCTCCATGG               |                              |
| <b>PAM</b>           | DPH              | GTCGTA                           | TGGTGAAGAC                    |                              |
|                      | IL-6             | CCTTCAGTCCAGTCGCC<br>TTCTCC      | GCATCACCTTTGGCA<br>TCTTCTCC   |                              |
|                      | IL-8             | CACTGTGAAAATTCAGA<br>AATCATTGTTA | CTTCACAAATACCTG<br>CACAACCTTC |                              |
|                      | IL-1<br>β        | ACCTGGACCTTGGTTCT<br>CTG         | CATCTGCCTGATGCT<br>CTTGT      |                              |
|                      | TNF<br>-α        | TGGTGGTGCCGACAGAT<br>GG          | GGCTGATGGTGTGAG<br>TGAGGAA    |                              |
|                      | GA               | TGCCAACGTGTCGGTTG                | TGTCATCATATTTGG               |                              |
| DPH                  | T                | CAGGTTT                          |                               |                              |

**Table S2. Primers used were shown in abundantly expressed miRNAs in PRRSV infection and normal cells.**

| <b>miRNA<br/>name</b>   | <b>miRNA<br/>Sequence(5' To 3')</b> | <b>RT primer(5' To 3')</b>                                     | <b>Forward Primer(5' To 3')</b> | <b>Reversed Primer(5' To<br/>3')</b> | <b>PCR<br/>product<br/>Length<br/>(bp)</b> |
|-------------------------|-------------------------------------|----------------------------------------------------------------|---------------------------------|--------------------------------------|--------------------------------------------|
| Ssc-miR<br>-27b         | UUCACAGUGGC<br>UAAGUUCUGC           | GTCGTATCCAGTGCA<br>GGGTCCGAGGTATTC<br>GCACTGGATACGACG<br>CAGAA | GGCCGTTACAGTGGC<br>TAAG         | CAGTGCAGGGTCCGA<br>GGTAT             | 62                                         |
| Ssc-miR<br>-30d_R-<br>1 | UGUAAACAUC<br>CCGACUGGAAG<br>C      | GTCGTATCCAGTGCA<br>GGGTCCGAGGTATTC<br>GCACTGGATACGACG          | TGCCGGCTGTAAACAT<br>CCC         | CAGTGCAGGGTCCGA<br>GGTAT             | 66                                         |

|                         |                                 |                                                                |                           |                           |     |
|-------------------------|---------------------------------|----------------------------------------------------------------|---------------------------|---------------------------|-----|
|                         |                                 | CTTC                                                           |                           |                           |     |
| Ssc-miR<br>-145_R-<br>1 | GUCCAGUUUUC<br>CCAGGAAUCCC<br>U | GTCGTATCCAGTGCA<br>GGGTCCGAGGTATTC<br>GCACTGGATACGACA<br>GGGAT | TTGCTGCTGTCCAGTT<br>TTCC  | CAGTGCAGGGTCCGA<br>GGTAT  | 67  |
| Ssc-miR<br>-23A_R<br>+1 | AUCACAUUGCC<br>AGGGAUUUCCA      | GTCGTATCCAGTGCA<br>GGGTCCGAGGTATTC<br>GCACTGGATACGACT<br>GGAAA | TGGCTGATCACATTGC<br>CAG   | CAGTGCAGGGTCCGA<br>GGTAT  | 64  |
| Ssc-miR<br>-199A-5<br>p | CCCAGUGUUCA<br>GACUACUGUU<br>C  | GTCGTATCCAGTGCA<br>GGGTCCGAGGTATTC<br>GCACTGGATACGACG<br>AACAG | GCTGGCCCAGTGTTCA<br>GACTA | CAGTGCAGGGTCCGA<br>GGTAT  | 64  |
| TLR 4                   |                                 |                                                                | TCAGTTCTCACCTTCC<br>TCCTG | GTTCATTCTCACCC<br>AGTCTTC | 166 |

**Table S3. The predicted targets of ssc-miR-30d\_R-1.**

| Predi<br>cted<br>Targe<br>t | Primer Sequence                      |                                        |
|-----------------------------|--------------------------------------|----------------------------------------|
|                             | Forward                              | Reverse                                |
| CD4                         | GTCAGAGCTCCTTGCTTCTGCTTTTC<br>CAG    | GTCATCTAGACCTGTGCTTCATGCTT<br>CAGA     |
| NFYB                        | GTCAGAGCTAAATGGTGCCCCTTTC<br>ATTT    | GTCATCTAGAACGTTTCTTGTTCCC<br>ACAG      |
| RAN<br>BP9                  | GTCAGAGCTCGTTCAAATTGATCAT<br>CACAAA  | GTCATCTAGAGAGCGGGGGTCAGA<br>ATATC      |
| NFAT<br>5                   | GTCAGAGCTCCACACTTACAAACTG<br>GGAACA  | GTCATCTAGACCATAACATTACCCCC<br>TTCATT   |
| TLR4                        | GTCAGAGCTCCTGGTGATTGAGTGA<br>TGCCC   | GTCATCTAGAATCAGGAGCCTTCTG<br>ATTTA     |
| CD53                        | GTCAGAGCTAAATCATGCCCAGTCC<br>ACTC    | GTCATCTAGATGAAACCTCACCTTT<br>GGAGAA    |
| IL1A                        | GTCAGAGCTTGTCAACTCCTTGATGAT<br>CTCTG | GTCATCTAGACAGGGCTCCCAGTTA<br>CTAGAAT   |
| CD8A                        | GTCAGAGCTTCACACACACAACGGT<br>GAAG    | GTCATCTAGACCTCAGCCTCATTCC<br>TTTGT     |
| EPCA<br>M                   | GTCAGAGCTCCAGCATTTGGACTGC<br>ATAG    | GTCATCTAGATCAAAGTAAACAGAA<br>AGGCAAACA |
| IRG6                        | GTCAGAGCTCCCCTGTATTTCCATTT<br>TGAAG  | GTCATCTAGAATCTGAGGGCAGACA<br>AGGAA     |
| IL12A                       | GTCAGAGCTAAAAATTGGAACCAAA            | GTCATCTAGAGGGAGCCTCACATCT              |

|               | GAAATG                                    | TTCAA                                   |
|---------------|-------------------------------------------|-----------------------------------------|
| IL12B         | GTCAGAGCTTTTGAGGAGGTCCTGG<br>AGAG         | GTCATCTAGAGGTGGGGAGTGAAGT<br>TGAAT      |
| MMD           | GTCAGAGCTTCCCCCTCACAGCAAA<br>TAAG         | GTCATCTAGAGCACTGACTTTCAAC<br>CTGACC     |
| 5'UT<br>R     | GCGACTAGTATGACGTATAGGTGTT<br>GGC          | ATAAAGCTTTGGTTAAAGGGGTGGA<br>GAG        |
| nsp1 $\alpha$ | GCGGAGCTCATGTCTGGGATAC<br>TTGATCGGTGCAC   | ATAAAGCTTCTGCGGGAGCGGCAA<br>GTTGGTTAAC  |
| nsp1 $\beta$  | GCGACTAGTAGGCCCAAACCTGAGG<br>ACTTTTGCCC   | ATAAAGCTTACCGTACCACTTATGA<br>CTGCCAAACC |
| nsp2          | ACAACACTAGTGCCGAAAGAGAG<br>CAAGGAAAACACG  | ACAACGCGTGCCCAGTAACCTGCCA<br>AGAATGGCAA |
| nsp3          | GCGACTAGTGGGGCACGCTACATCT<br>GGCACTTT     | ATAAAGCTTCTCAAGGAGGGACCCG<br>AGCTGAGA   |
| nsp4          | ATAACTAGTGGCGCTTTCAGAACTC<br>AAAAGCCCTC   | ATAAAGCTTTTCCAGTTCGGGTTTG<br>GCAGCAAGCA |
| nsp5          | ATAACTAGTGGAGGCCTTTCACAG<br>TTCAACTTCT    | GCGAAGCTTCTCGGCAAAGTAT<br>CGCAAGAAGAAAG |
| nsp6          | GCGACTAGTATGACGTATAGGTGTT<br>GGC          | ATAAAGCTTTGGTTAAAGGGGTGGA<br>GAG        |
| nsp7          | ATAACTAGTTCGCTGACTGGTGCCCT<br>CGCCATGAG   | GCGAAGCTTTTCCCACTGAGCTCTT<br>CTATTCTCG  |
| nsp8          | ATAACTAGTGCCGCAAGCTTTCGG<br>TGGAGCAAG     | GCGACGCGTCTAGCAGTTTAAACAC<br>TGCTCCTTAG |
| nsp9          | ACAACACTAGTGGAGCAGTGTTTA<br>AACTGCTAGCCGC | GAGAAGCTTCTCATGATTGGACCTG<br>AGTTTTTCCC |
| nsp10         | GCGACTAGTGGGAAGAAGTCCAGAA<br>TGTGCGGGTA   | ATAAAGCTTTTCCAGGTCTGCGCAA<br>ATAGCGCGGA |
| nsp11         | ATAACTAGTGGGTCGAGCTCCCCGC<br>TCCCCAAG     | GCGAAGCTTTTCAAGTTGGAATAG<br>GCCGTCTTG   |
| nsp12         | AGAACACTAGTGGCCGCCATTTTA<br>CCTGGTATCAACT | TCAAAGCTTTCAATTCAGGCCTAAA<br>GTTGGTTCAA |
| ORF2<br>a     | GAGACTAGTATGAAATGGGGTCTAT<br>GCAAAGCCTC   | GAGACGCGTTCACCATGAGTTCAAA<br>AGAAAAGTTG |
| ORF2<br>b     | TATACTAGTATGGGGTCTATGCAAA<br>GCCTCTTTGA   | GCGAAGCTTTCATAAGATCTTCTGT<br>AATTGCTCAG |
| ORF3          | GGCACTAGTATGGCTAATAGCTGTA<br>CATTCCTCCA   | TCAAAGCTTCTATCGCCGTGCGGCA<br>CTGAGAAATT |
| ORF4          | GGCACTAGTATGGCTGCGTCCTTTCT<br>TTTCCTCTT   | TCGAAGCTTTCAAATTGCCAGTAGG<br>GATGGCAAAA |
| ORF5          | ATAACTAGTATGTTGGGGAAGTGCT<br>TGACCGCGTG   | TAAAAGCTTCTAGAGACGACCCCAT<br>AGTTCGCTG  |
| ORF6          | ATAACTAGTGAACATATGGGGTCGTC                | GGCAAGCTTCTTGCCGTTGTTATTTG              |

---

|       |                                       |                                       |
|-------|---------------------------------------|---------------------------------------|
|       | TCTAG                                 | GCAT                                  |
| ORF7  | GGCACTAGTATGCCAAATAACAACG<br>GCAAGCAG | TAAAAGCTTTCATGCTGAGGGTGAT<br>GCTGTGGC |
| 3'UTR | GGCGAGCTCTGGGCTGGCATTCTTT             | GGCAAGCTTTTAATTACGGCCGCAT<br>GG       |

---

UTR, untranslated region
